# Supplementary material
Source: Springer Nature journal article supplement (https://www.springermedizin.de/resource/supplementary/12890_2014_574_MOESM3_ESM.pdf/9505340)

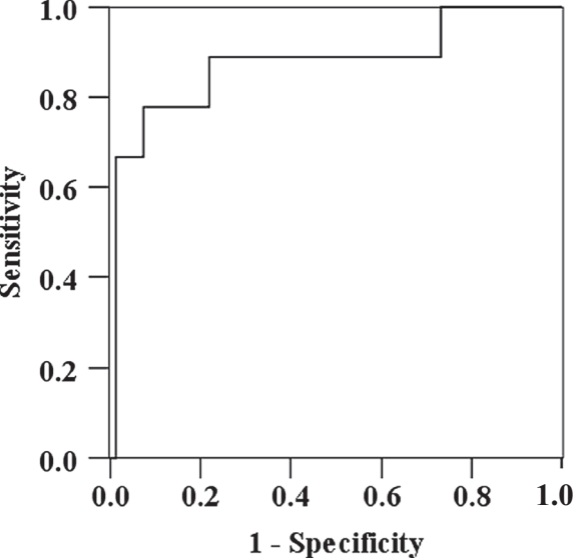

Supplement: MOESM3 [file 9505340]
